# Supplementary material
Source: PubMed Central journal article supplement (PMC5255950)
Supplement: ejhg2016150x1.pdf [file ejhg2016150x1.pdf]

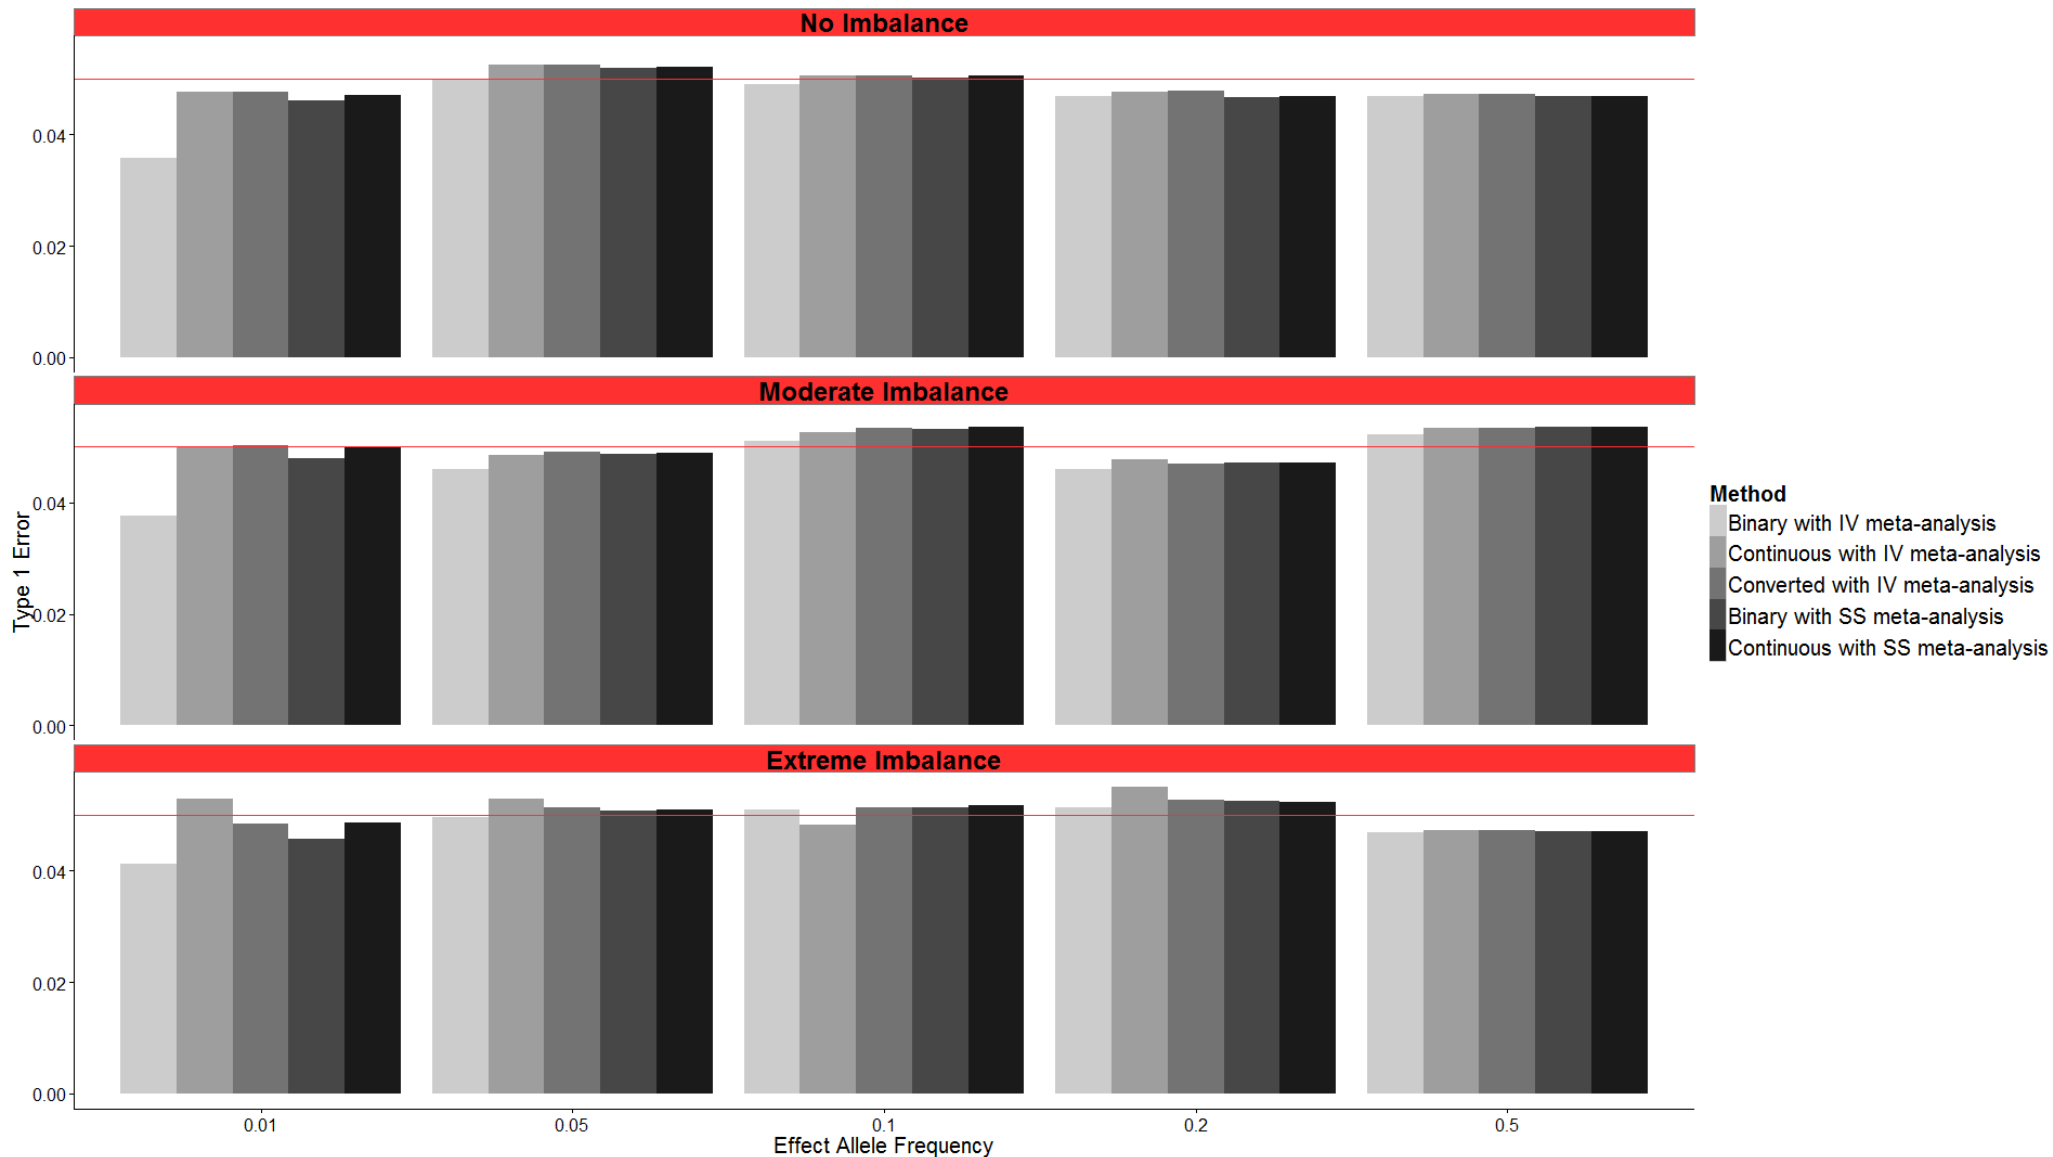

**Supplementary Figure S1.** Type I error rates to detect association ( $p < 0.05$ ) of a binary phenotype with a causal SNP, in the absence of population stratification or confounders, using alternative meta-analysis strategies for summary statistics obtained from linear and logistic regression models without random effects for the GRM (Table 1). Results are presented for a SNP with MAF in the range of 1-50%, and for variable extent of case-control imbalance (defined in Table 2).

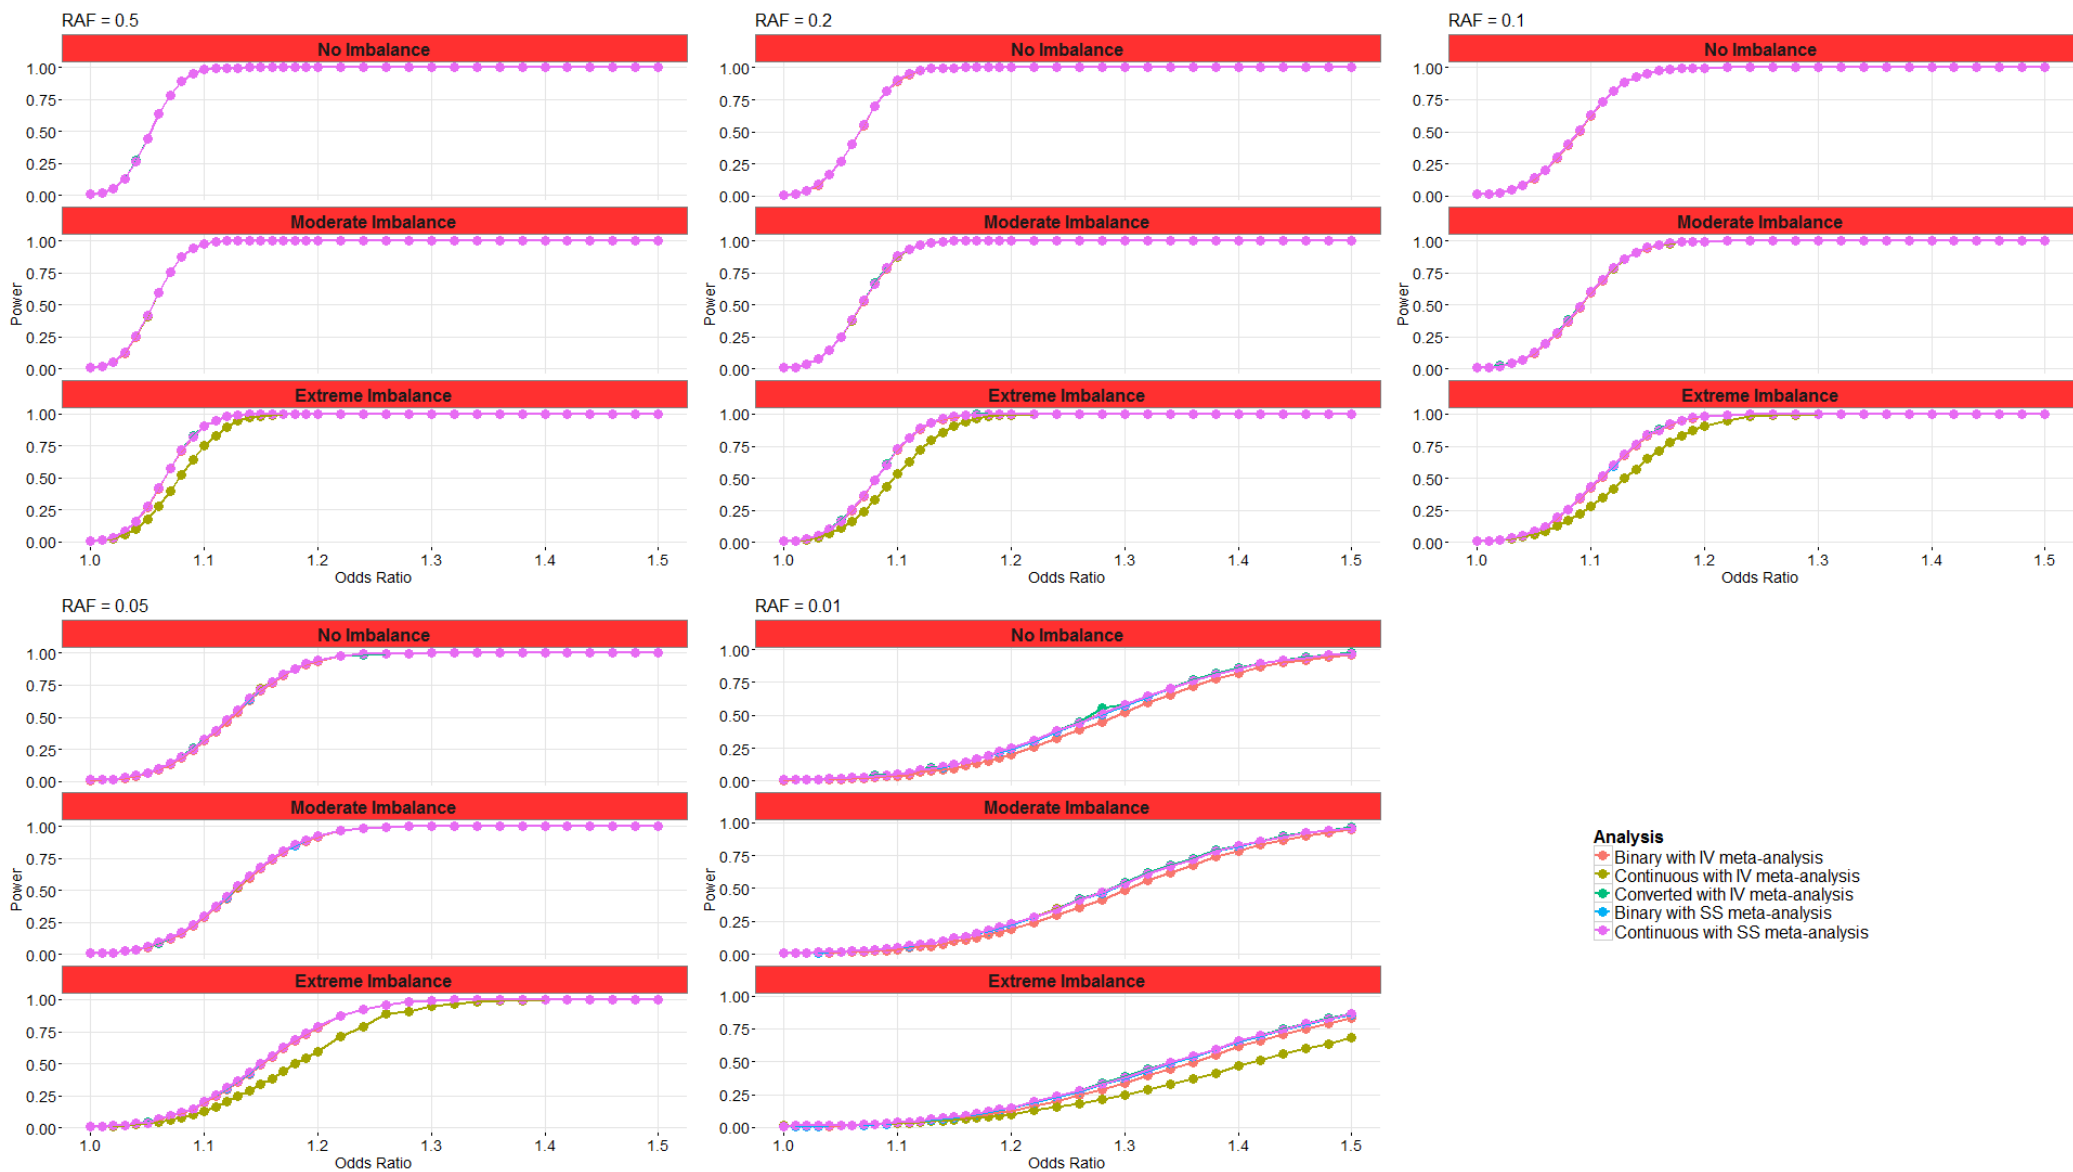

**Supplementary Figure S2.** Power to detect association ( $p < 0.01$ ) of a binary phenotype with a causal SNP, in the absence of population stratification or confounders, using alternative meta-analysis strategies for summary statistics obtained from linear and logistic regression models without random effects for the GRM (**Table 1**). Results are presented as a function of the allelic OR, for a causal SNP with RAF in the range of 1-50%, and for variable extent of case-control imbalance (defined in **Table 2**).

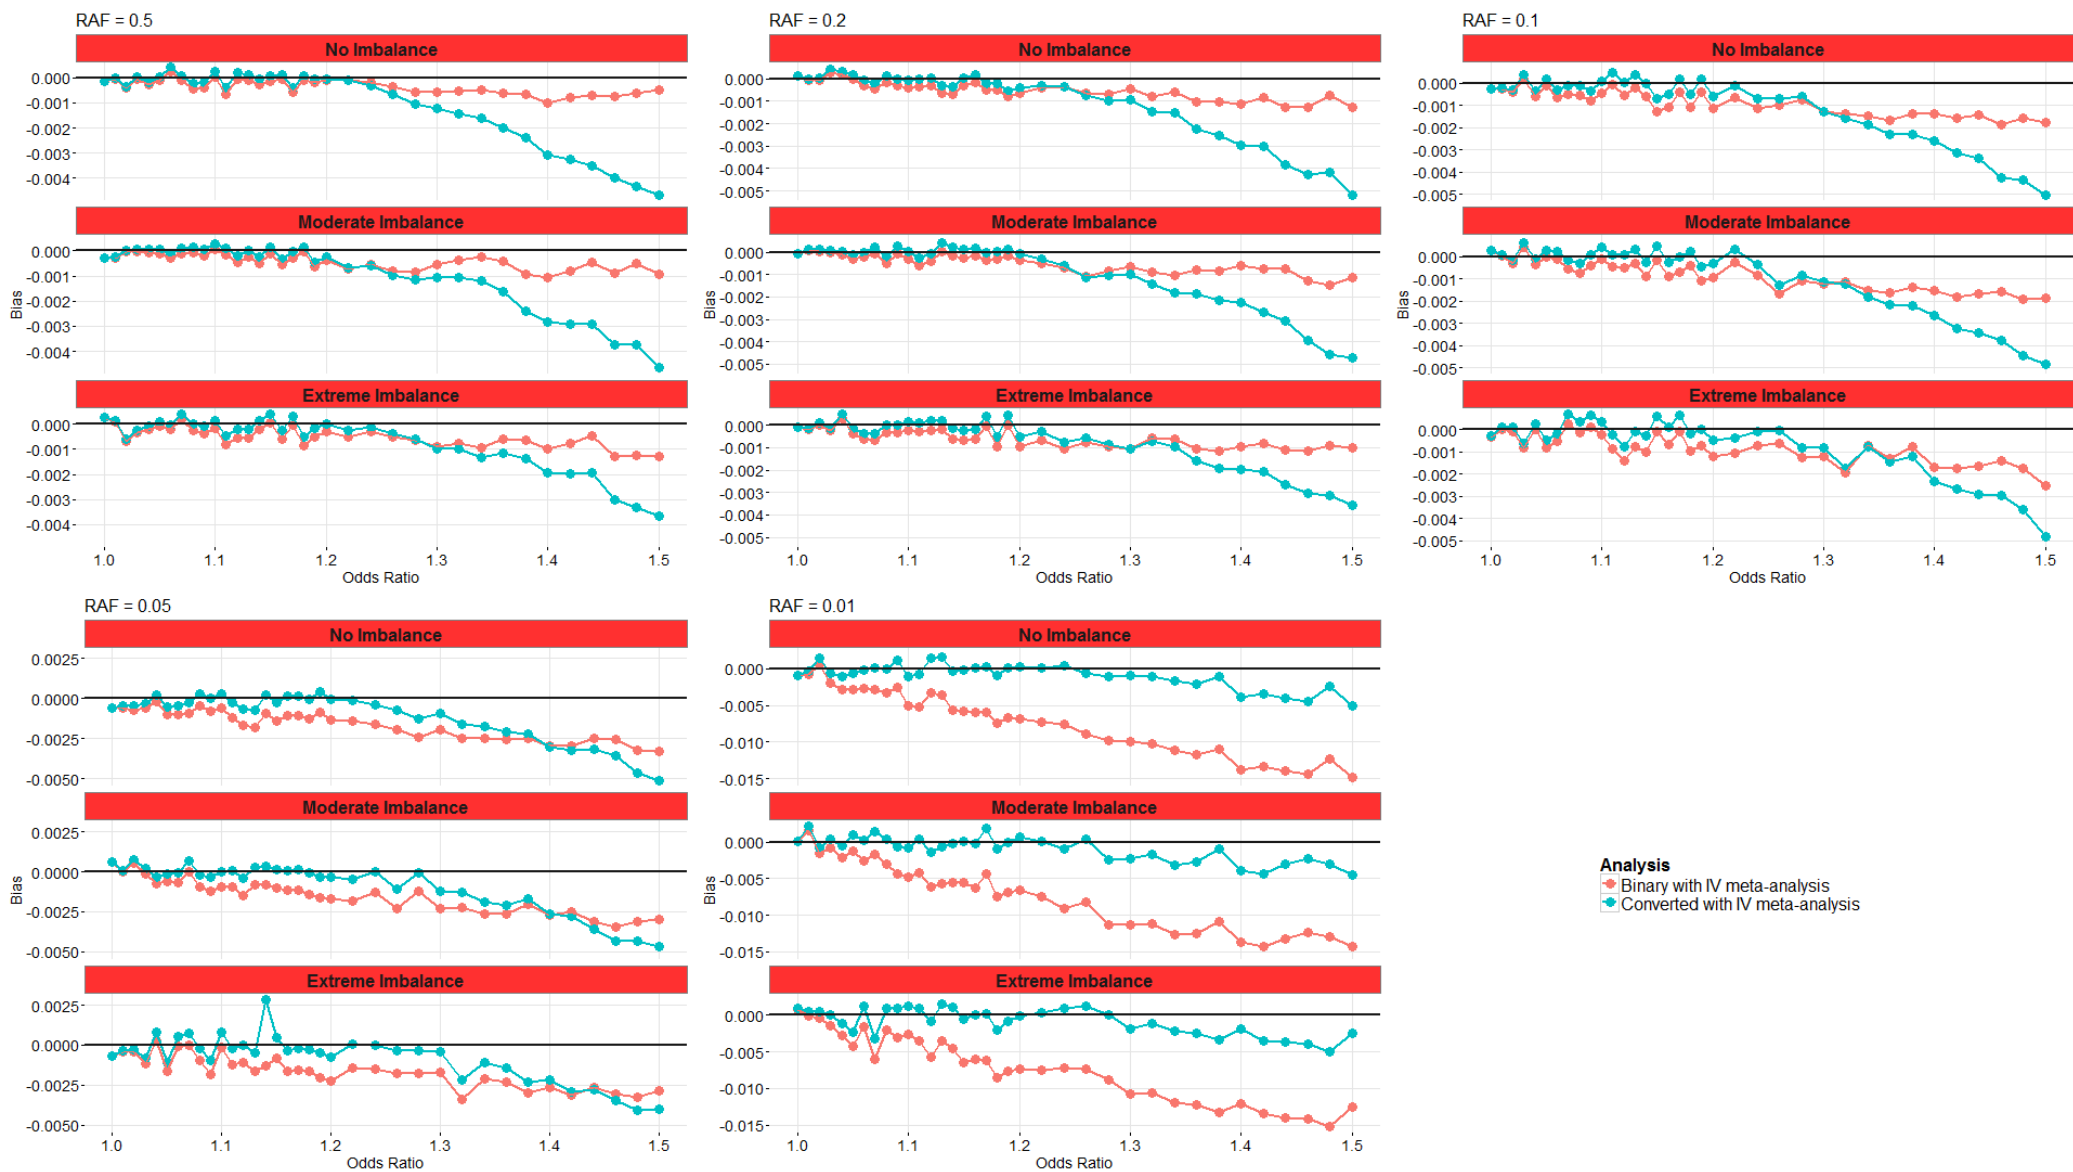

**Supplementary Figure S3.** Bias of the estimated allelic OR after meta-analysis under the inverse-variance weighting of effect sizes from the logistic regression model and the linear regression model after conversion to the log-odds scale. Results are presented as a function of the allelic OR, for a causal SNP with RAF in the range of 1-50%, and for variable extent of case-control imbalance (defined in **Table 2**).

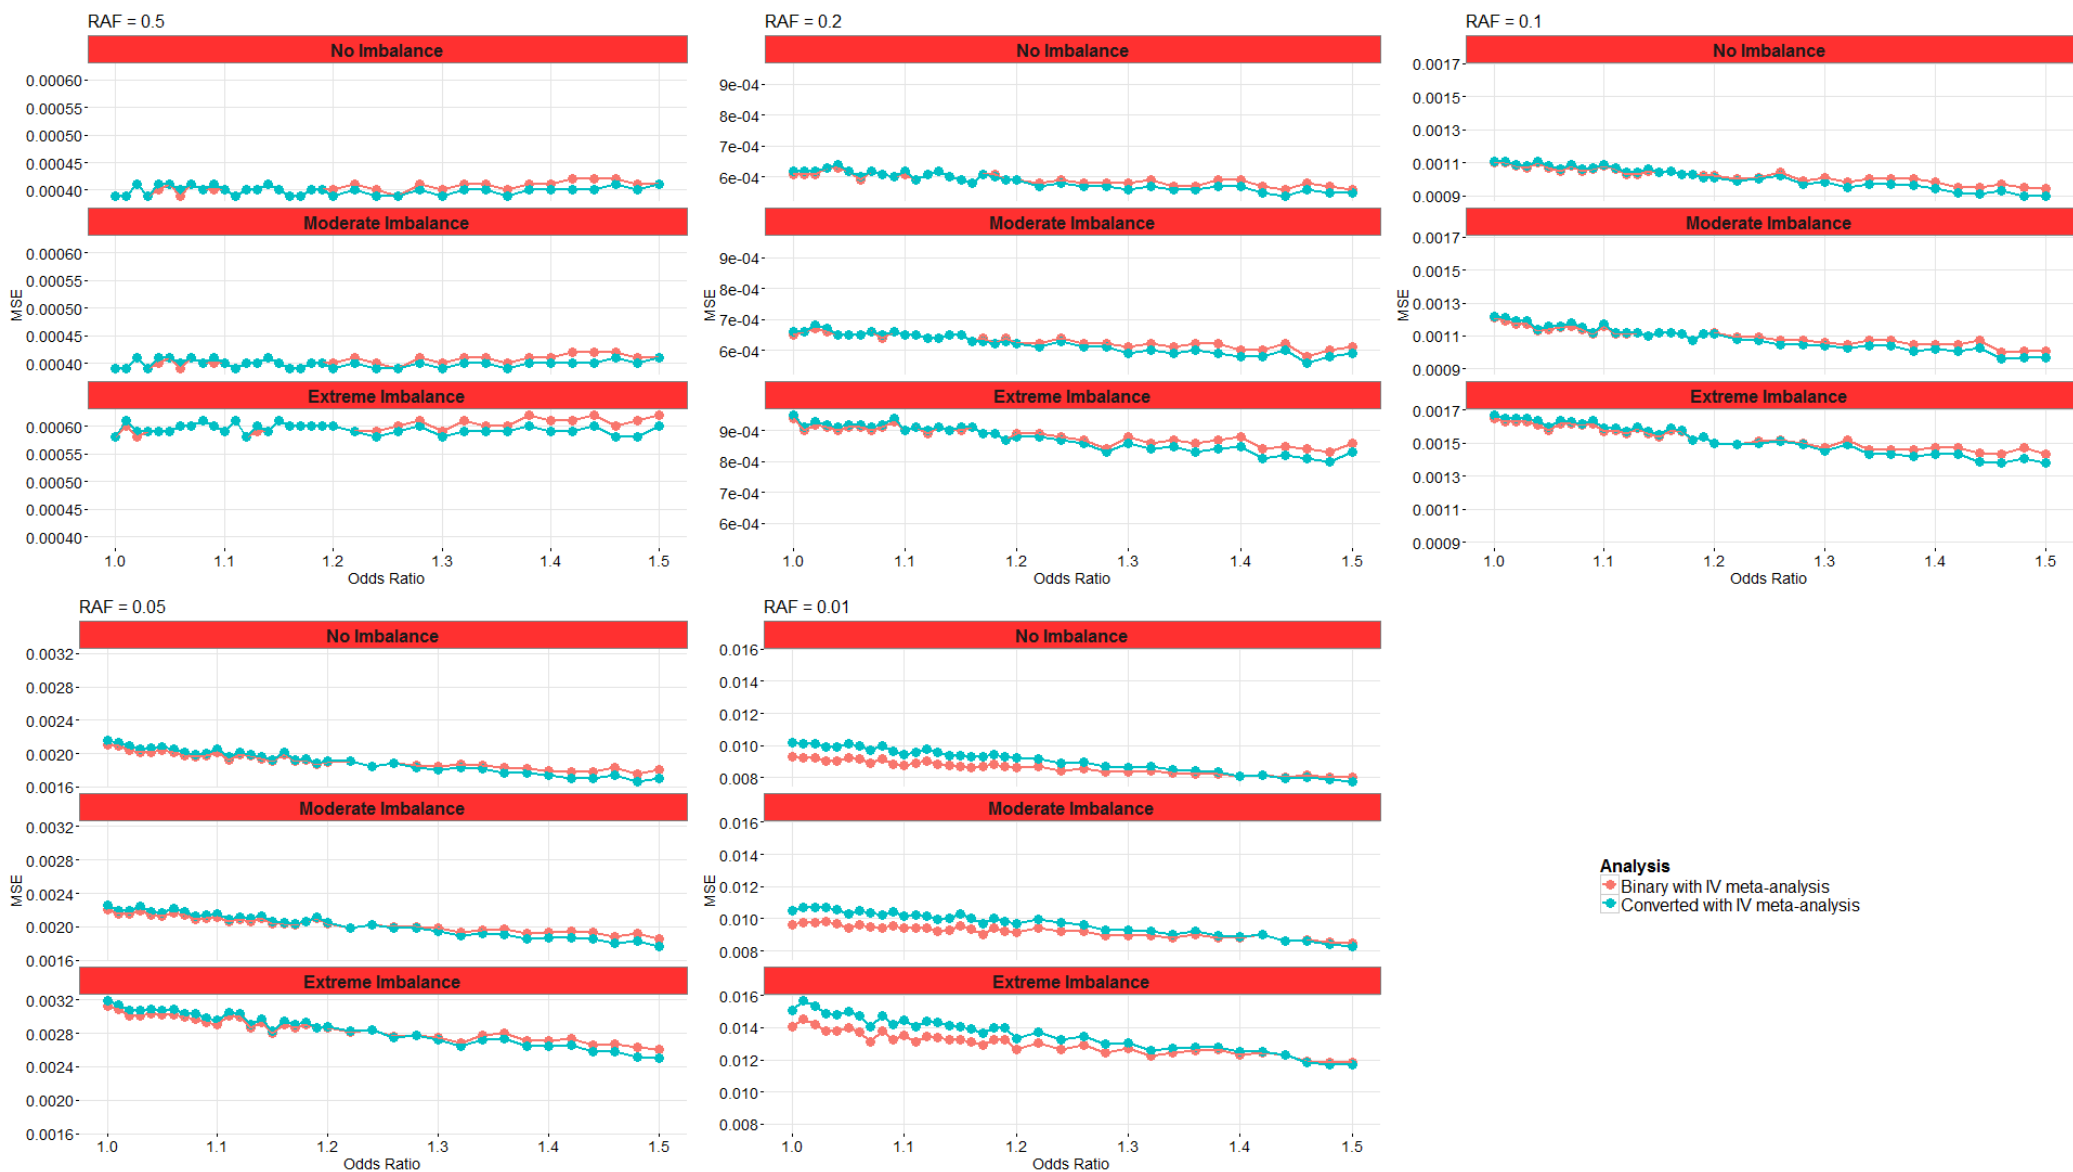

**Supplementary Figure S4.** MSE of the estimated allelic OR after meta-analysis under the inverse-variance weighting of effect sizes from the logistic regression model and the linear regression model after conversion to the log-odds scale. Results are presented as a function of the allelic OR, for a causal SNP with RAF in the range of 1-50%, and for variable extent of case-control imbalance (defined in **Table 2**).

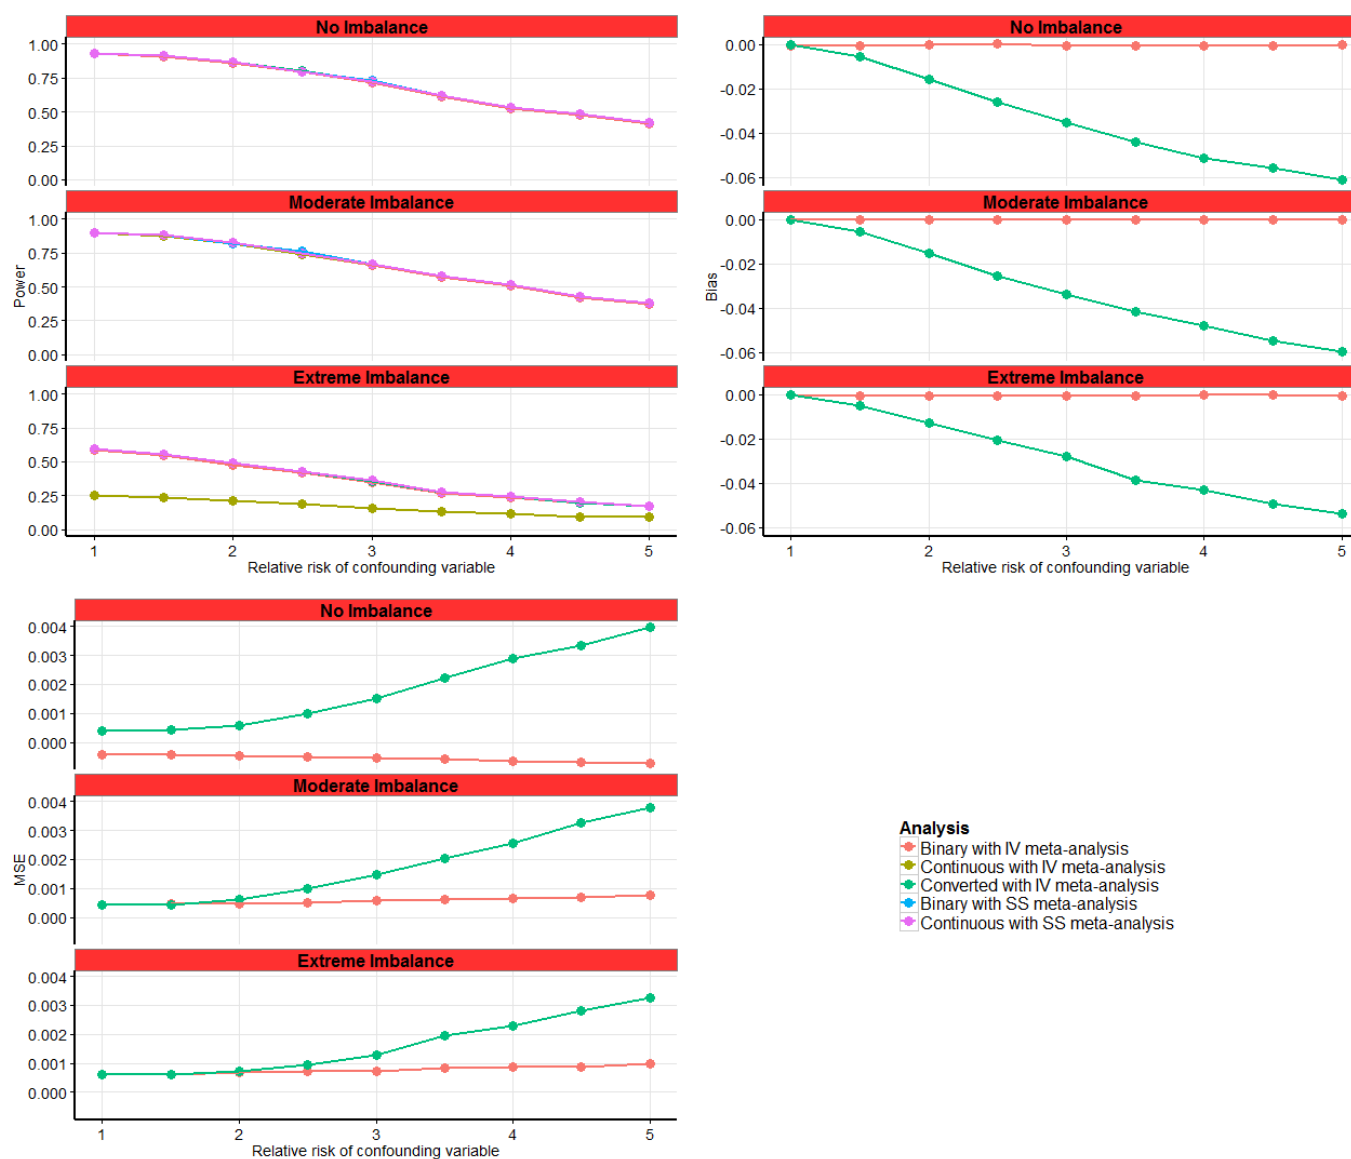

**Supplementary Figure S5.** Power to detect association (at genome-wide significance,  $p < 5 \times 10^{-8}$ ) of a binary phenotype with a causal SNP, in the absence of population stratification, but with a confounding variable, using alternative meta-analysis strategies for summary statistics obtained from linear and logistic regression models without random effects for the GRM (**Table 1**). Bias of the estimated allelic OR after meta-analysis under the inverse-variance weighting of effect sizes from the logistic regression model and the linear regression model after conversion to the log-odds scale. Results are presented as a function of the relative risk of the confounding variable, for a causal SNP with RAF 50% and allelic OR of 1.15, for variable extent of case-control imbalance (defined in **Table 2**).

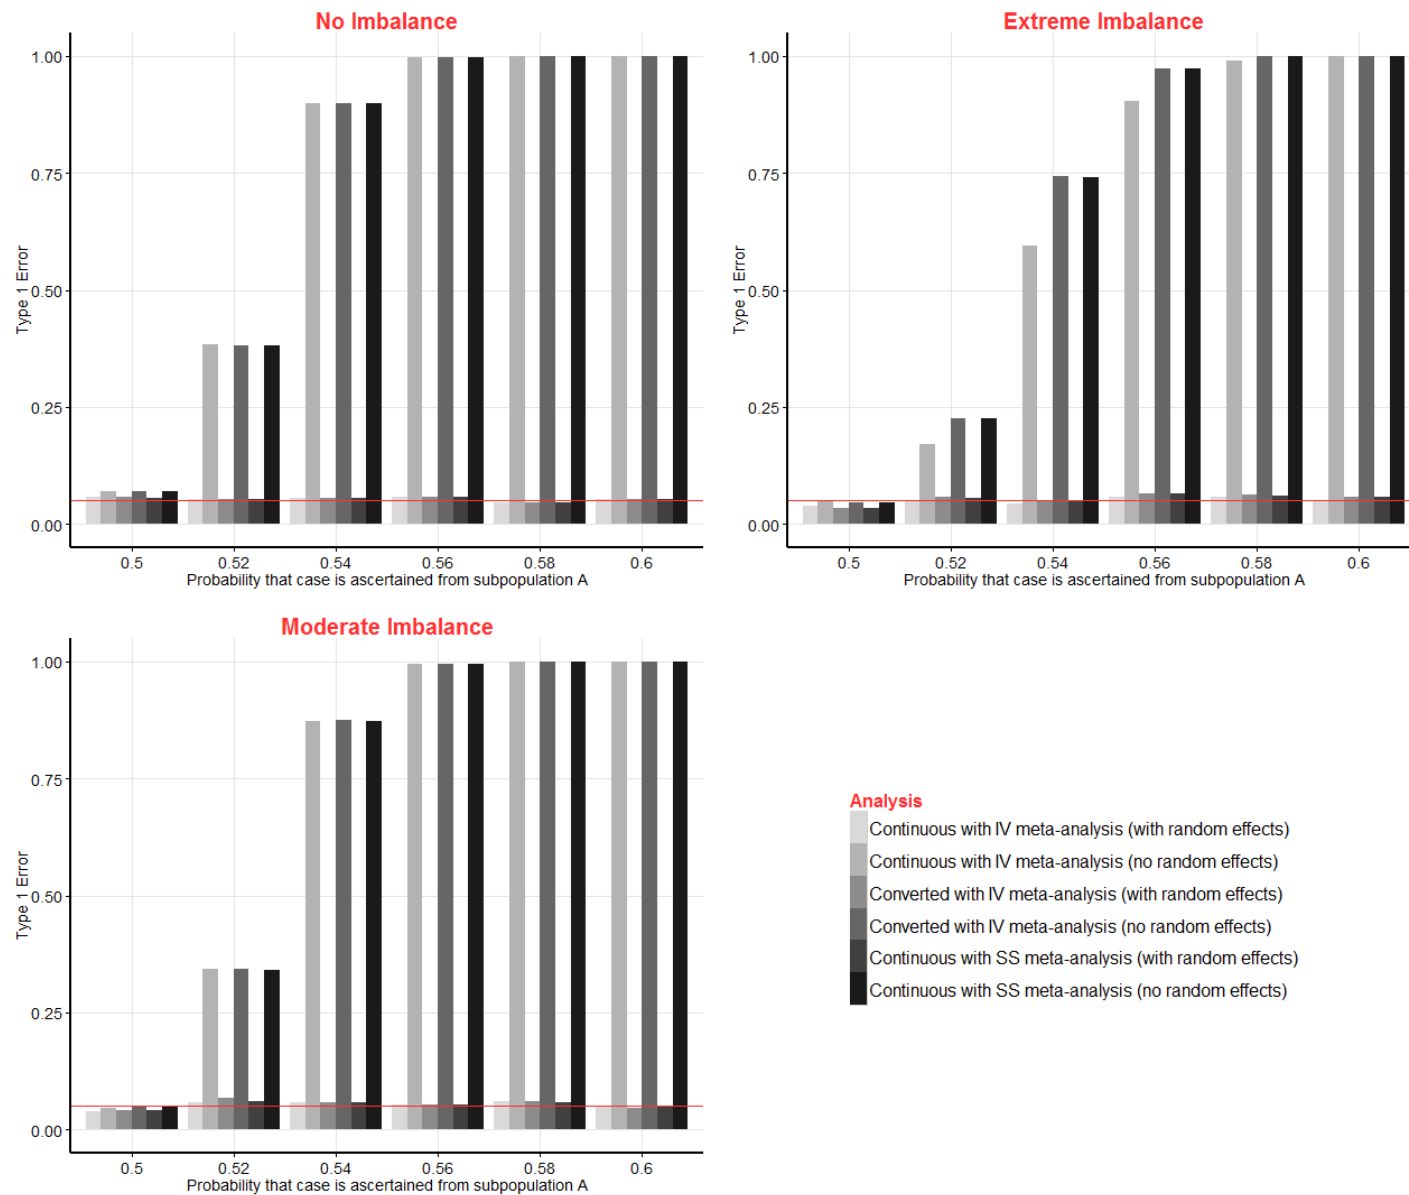

**Supplementary Figure S6.** Type I error rates to detect association ( $p < 0.05$ ) of a binary phenotype with a causal SNP, in the presence of population stratification, using alternative meta-analysis strategies for summary statistics obtained from linear regression models, with and without random effects for the GRM (**Table 1**), as a function of the probability that cases are ascertained from subpopulation A. Results are presented for a SNP with frequency of 40% in subpopulation A and 60% in subpopulation B, and for variable extent of case-control imbalance (defined in **Table 2**).
